# Supplementary material
Source: PubMed Central journal article supplement (PMC7642114)
Supplement: NIHMS1626289-supplement-2.pdf [file NIHMS1626289-supplement-2.pdf]

**A**

CD31 Staining in Human Melanoma Patients

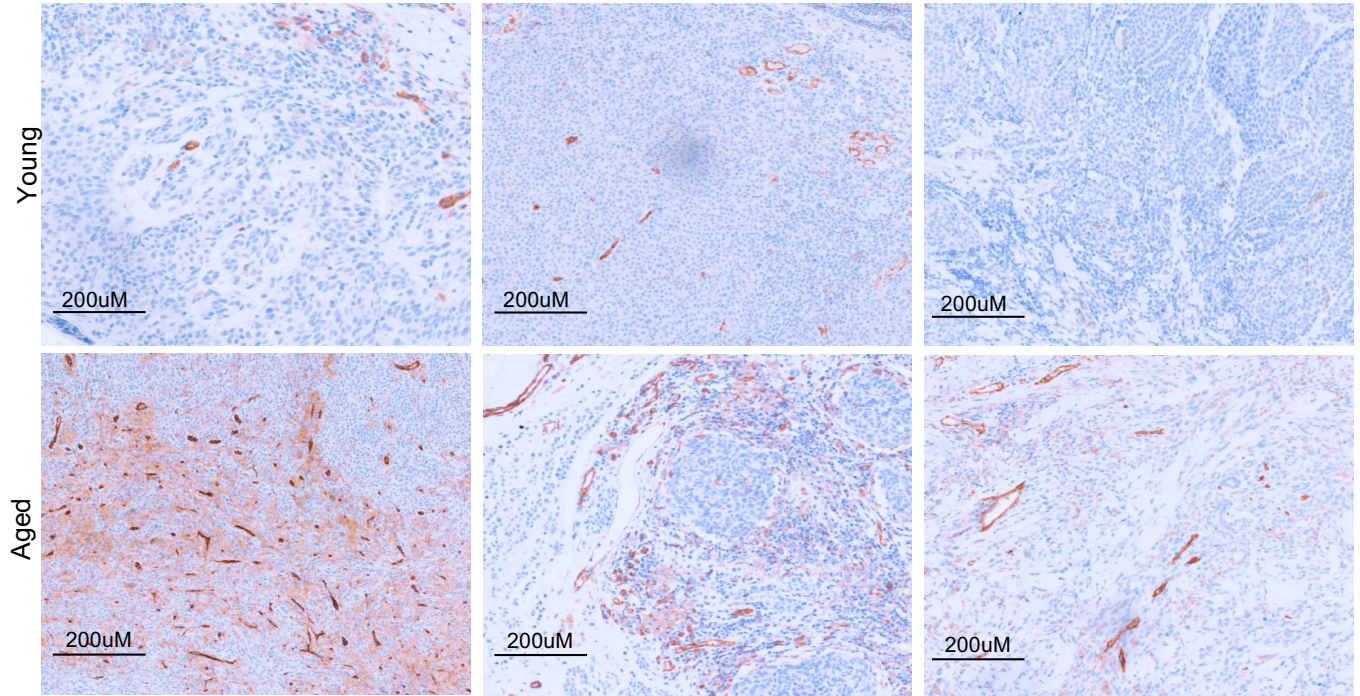**B**

CD105 staining in Yumm 1.7 mouse tumors

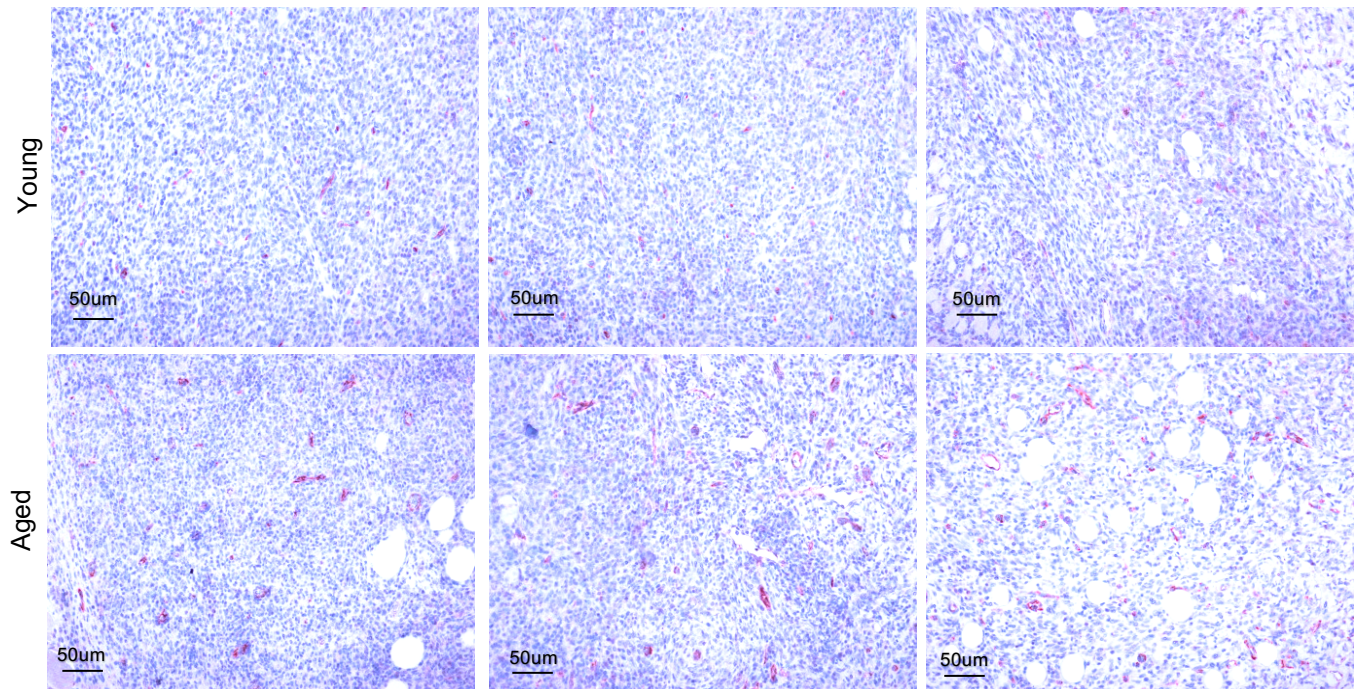

**Supplemental Figure 1**
