# Supplementary material
Source: PubMed Central journal article supplement (PMC7642114)

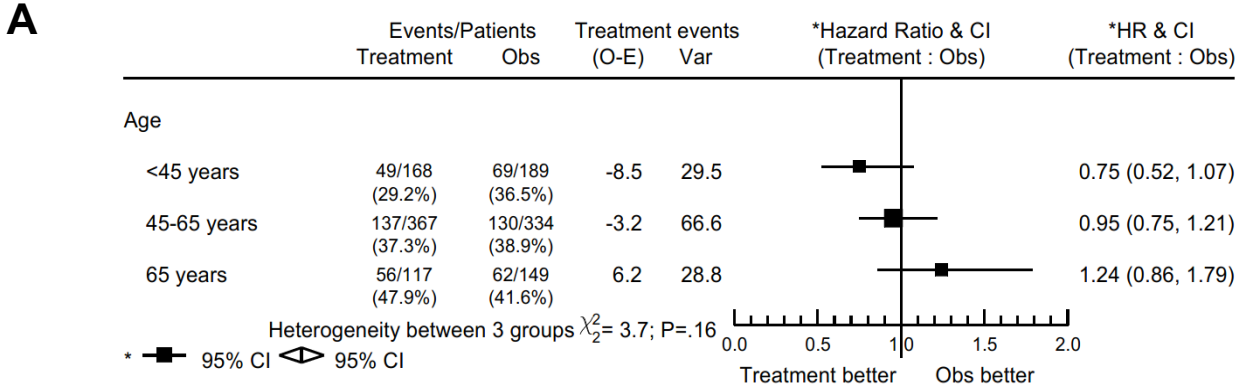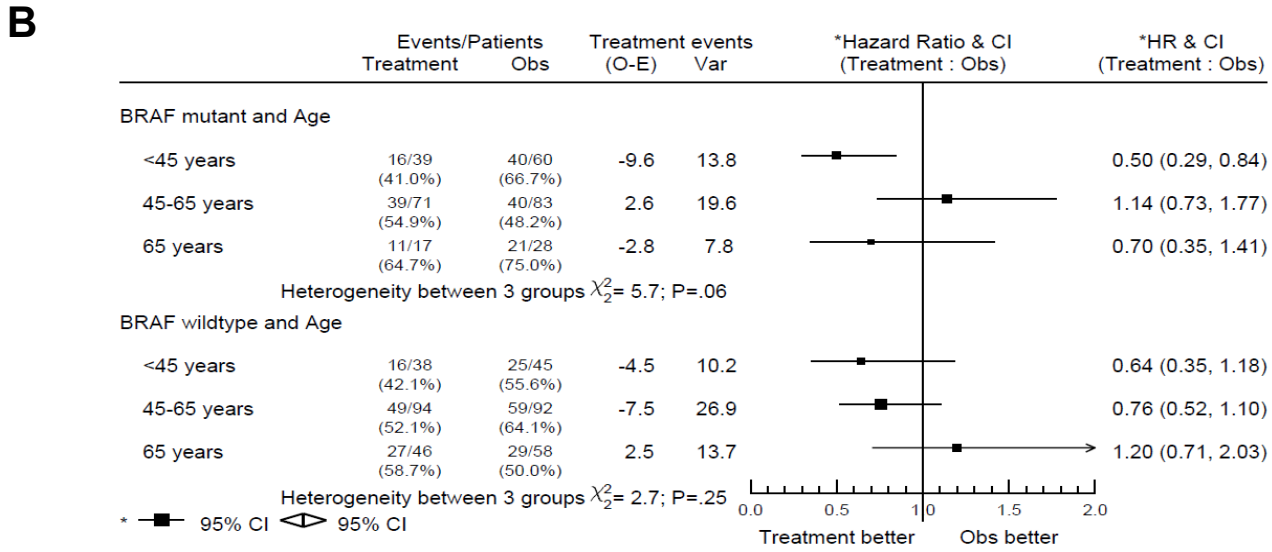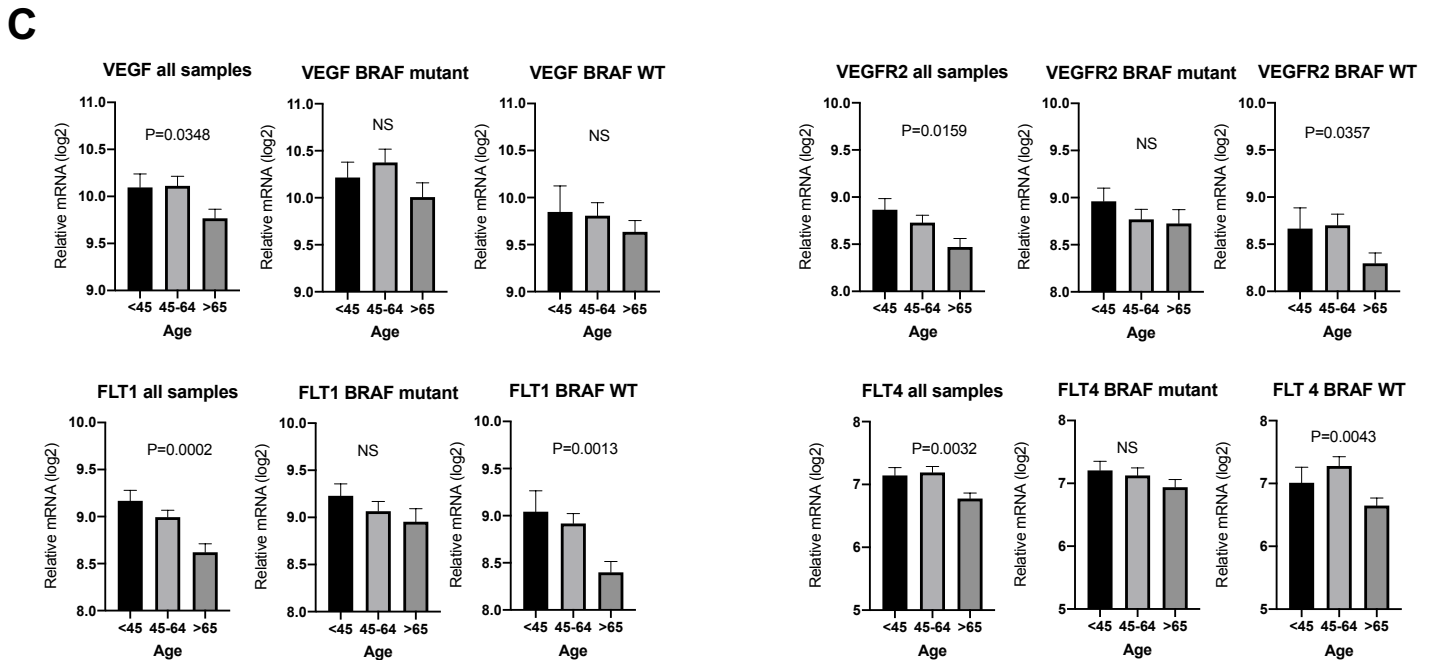

Supplemental Figure 2

Supplement: NIHMS1626289-supplement-3.pdf [file NIHMS1626289-supplement-3.pdf]

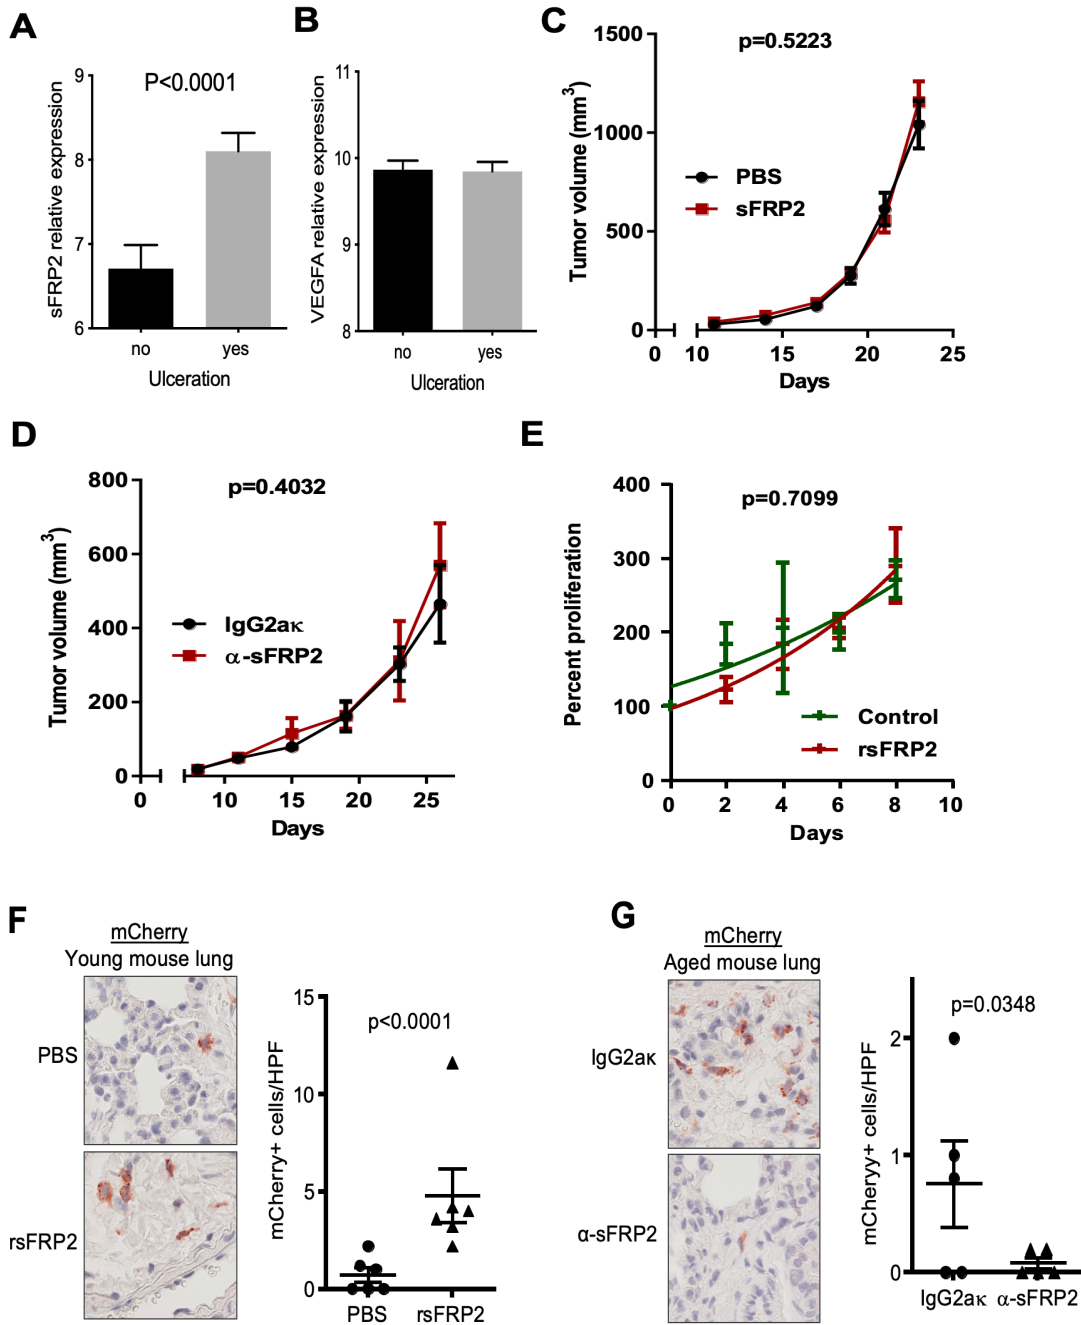

Supplemental Figure 3

Supplement: NIHMS1626289-supplement-4.pdf [file NIHMS1626289-supplement-4.pdf]

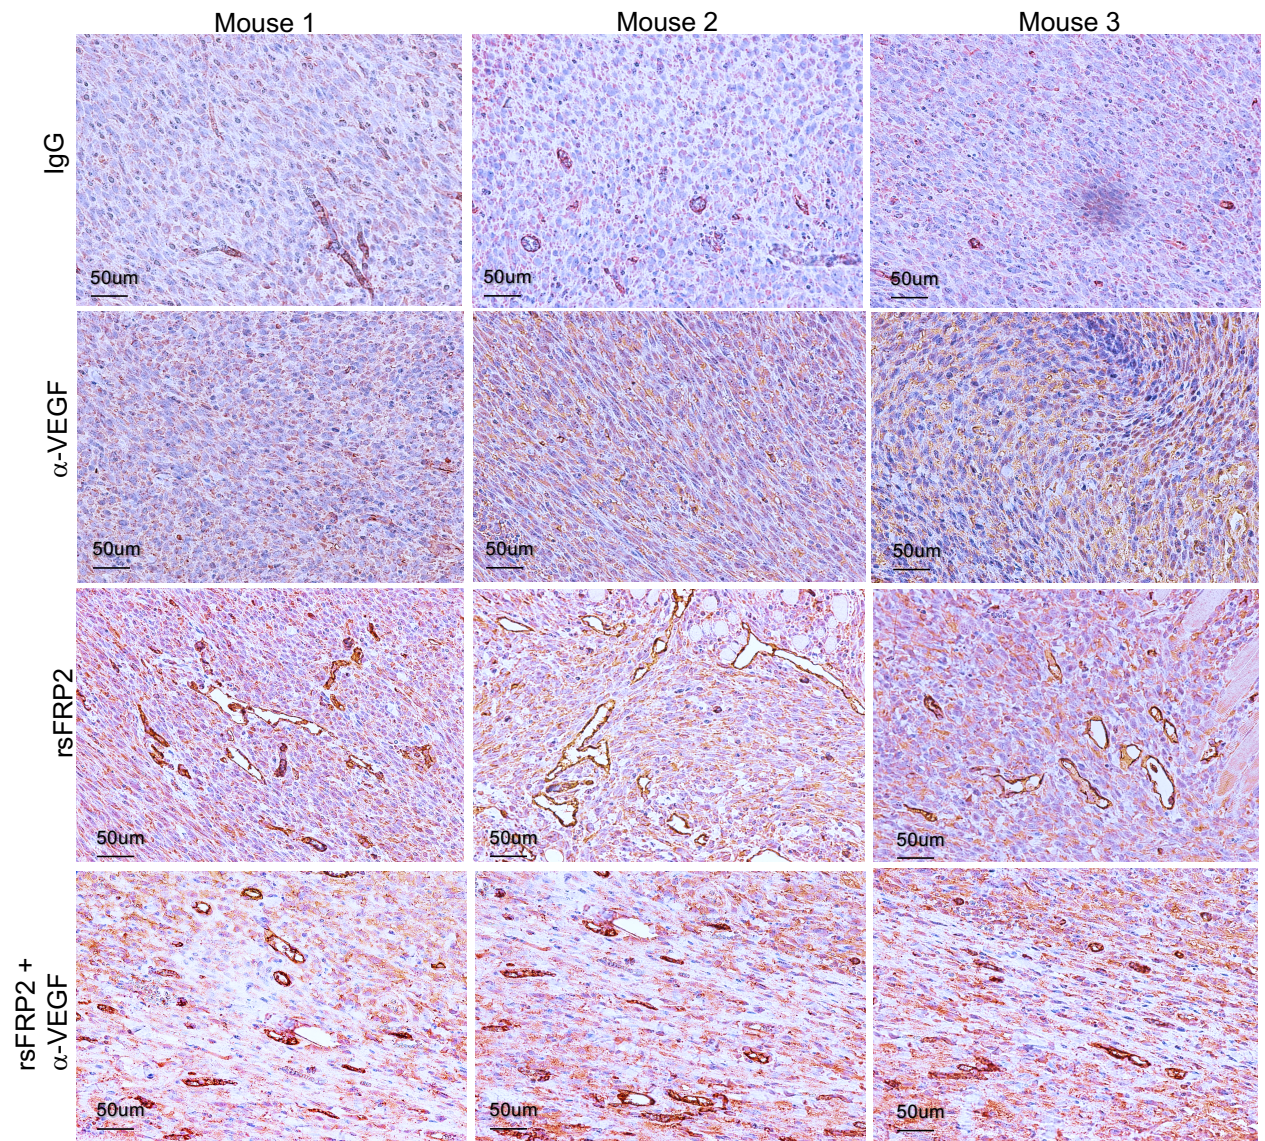

CD105 staining in Yumm 1.7 mouse tumors

## Supplemental Figure 4

Supplement: NIHMS1626289-supplement-5.pdf [file NIHMS1626289-supplement-5.pdf]

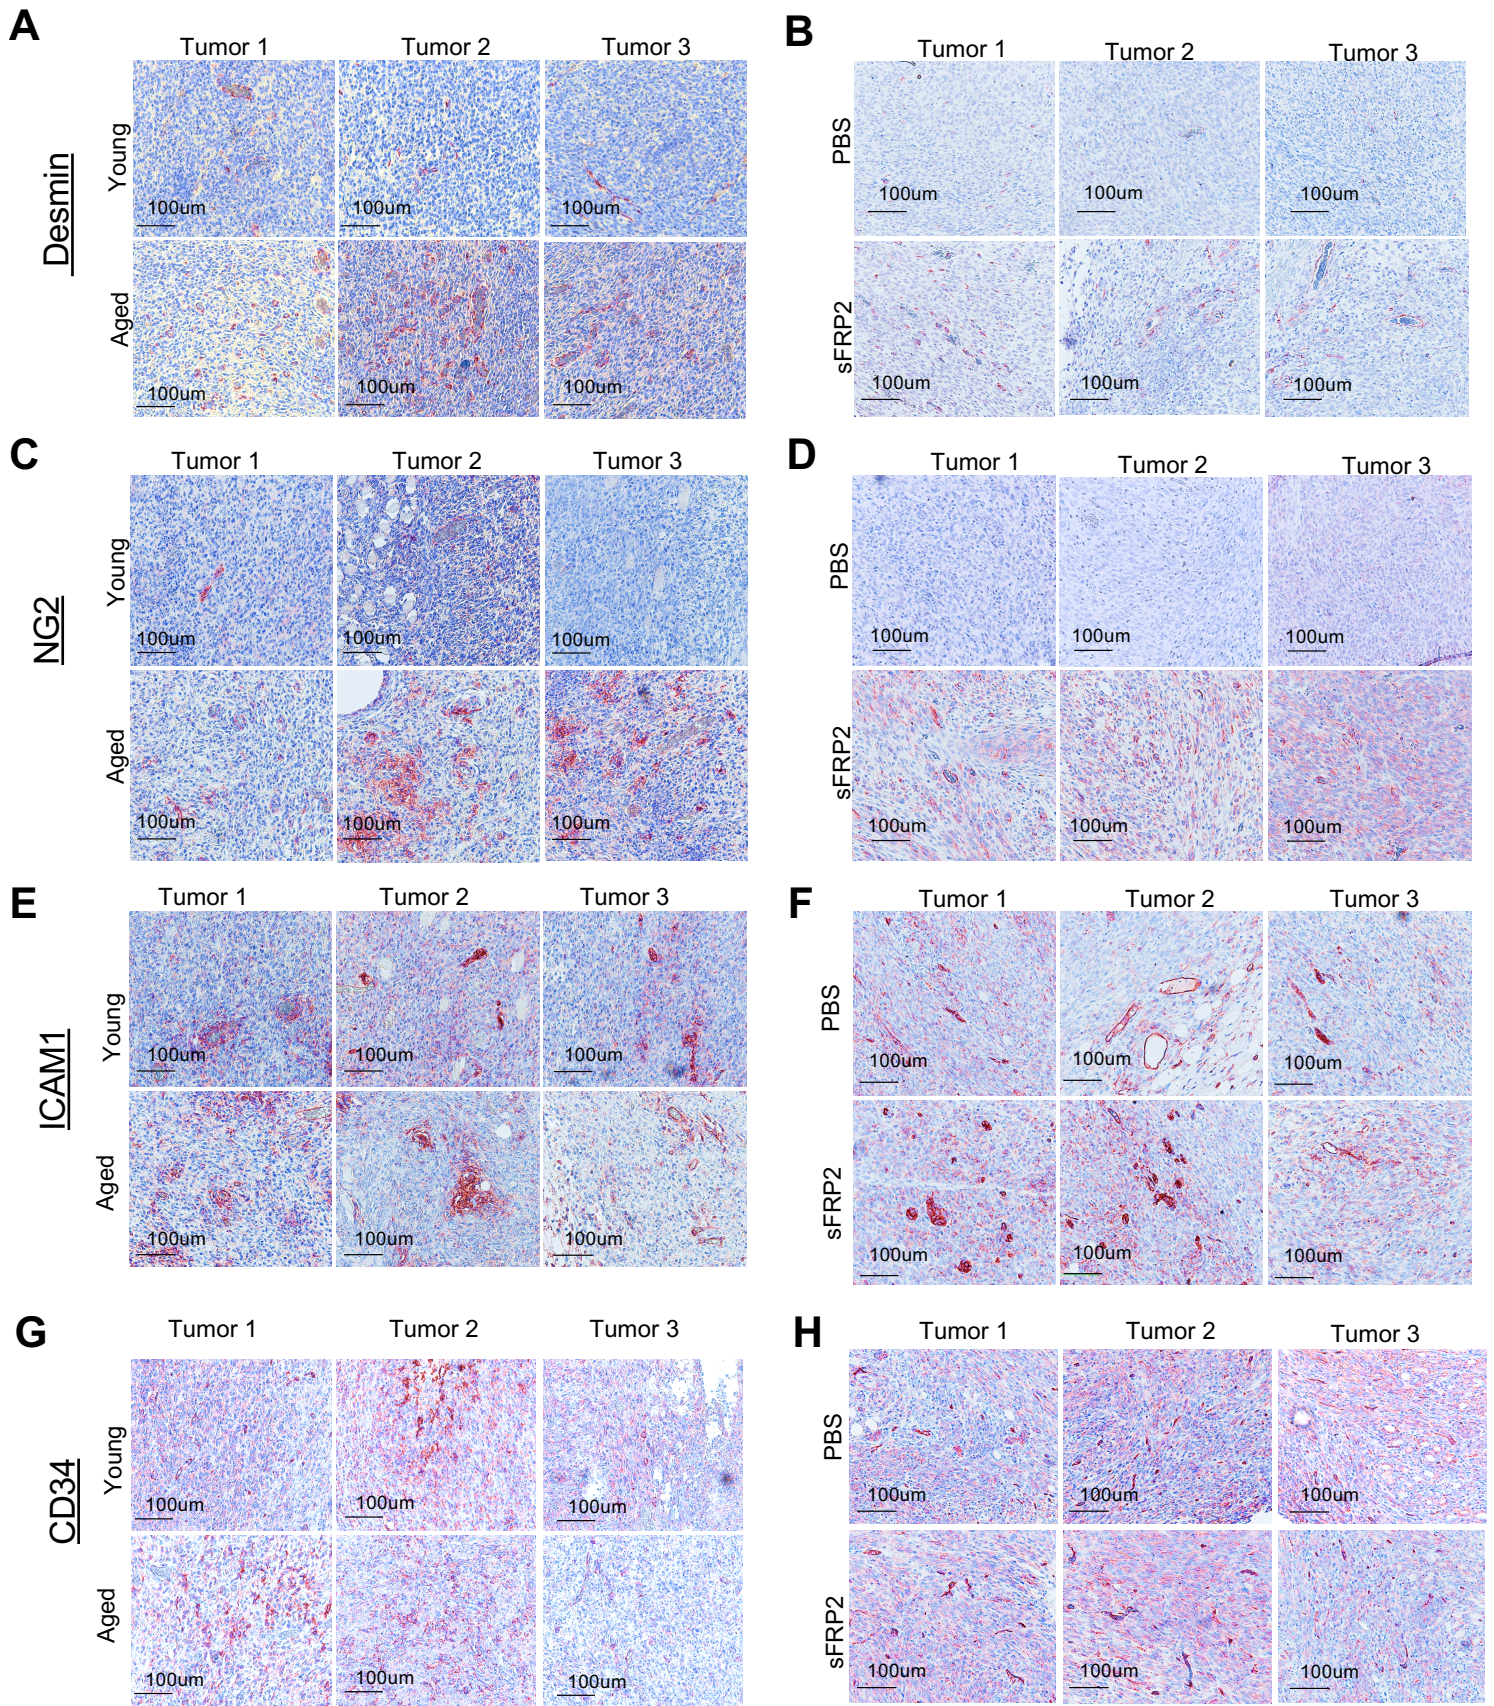

**Supplemental Figure 5**

Supplement: NIHMS1626289-supplement-6.pdf [file NIHMS1626289-supplement-6.pdf]

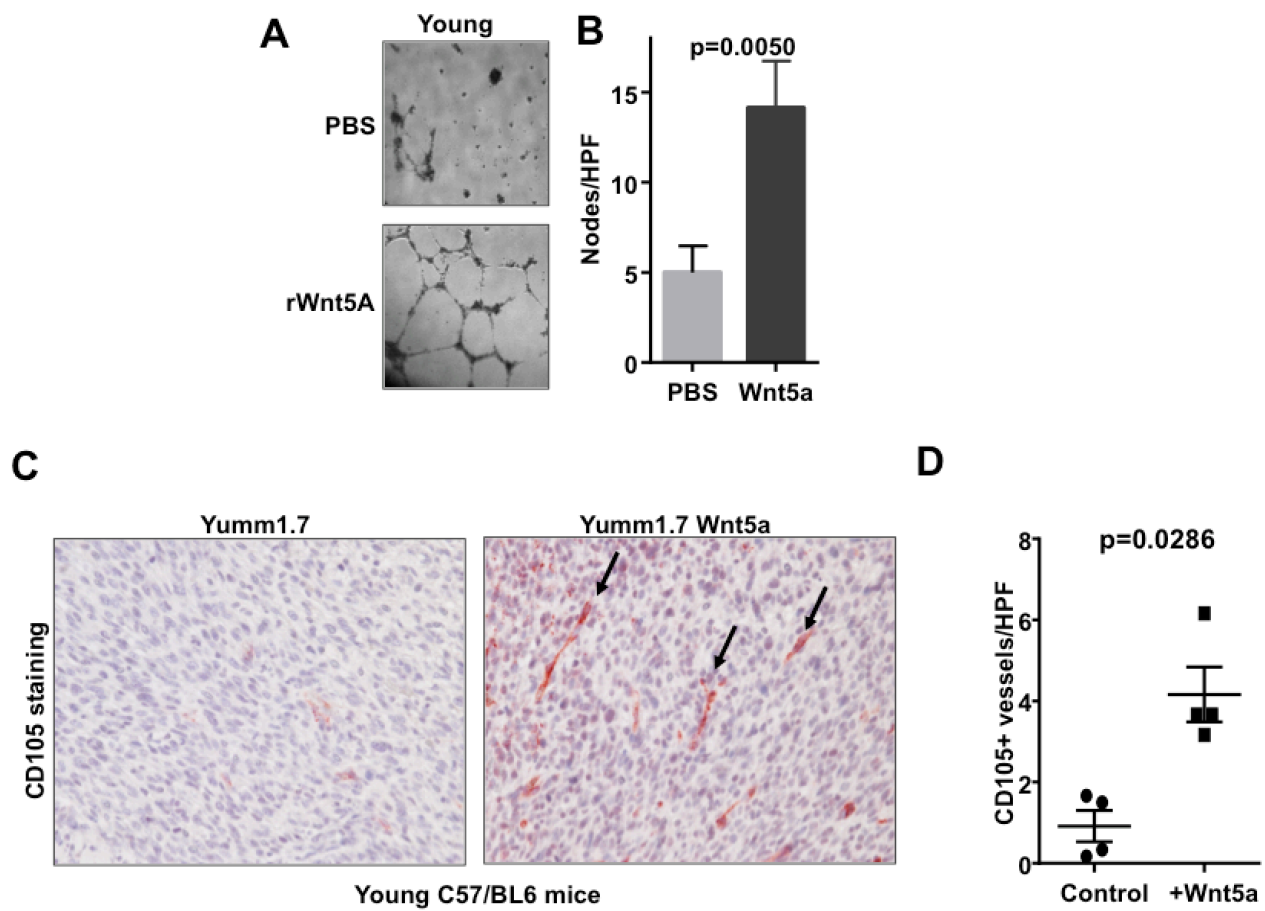

Supplemental Figure 6

Supplement: NIHMS1626289-supplement-7.pdf [file NIHMS1626289-supplement-7.pdf]
